# Supplementary material for: Taxonomic and Phylogenetic Updates on Apiospora: Introducing Four New Species from Wurfbainia villosa and Grasses in China
Source: MDPI journal article supplement (doi:10.3390/jof9111087), 2023-11-06
Supplement: s1 [file s1]

**Supplementary Table S1.** Synopsis of morphological characteristics of *Ap. marina* and its closely related species.

| Characters         | <i>Apiospora</i> species                                                                         |                                                                           |                                                                                                             |                                                                                                                                   |                                                                                                                                                                                  |
|--------------------|--------------------------------------------------------------------------------------------------|---------------------------------------------------------------------------|-------------------------------------------------------------------------------------------------------------|-----------------------------------------------------------------------------------------------------------------------------------|----------------------------------------------------------------------------------------------------------------------------------------------------------------------------------|
|                    | <i>A. acutiapicula</i>                                                                           | <i>Ap. marina</i>                                                         | <i>Ap. paraphaeospora</i>                                                                                   | <i>Ap. pseudorasikravindrae</i>                                                                                                   | <i>Ap. rasikravindrae</i>                                                                                                                                                        |
| Host/substrate     | <i>Bambusa bambos</i> /dead twigs                                                                | Seaweed                                                                   | <i>Bambusa</i> sp./culms                                                                                    | <i>Bambusa dolichoclada</i> /sheath                                                                                               | Soil, <i>Coffea arabica</i> /leaf, <i>Pinus thunbergii</i> /wood, marine submerged wood, <i>Oryza granulata</i> /leaf                                                            |
| Conidiomata        | 350–450 mm, pycnidial, immersed, aggregated, scattered, subglobose, ostiolate, black, coriaceous | NA                                                                        | NA                                                                                                          | NA                                                                                                                                | NA                                                                                                                                                                               |
| Conidiophores      | Reduced to conidiogenous cells                                                                   | NA                                                                        | Reduced to conidiogenous cells                                                                              | Basauxic, straight or flexuous, cylindrical, hyaline, thick, smooth-walled, aseptate, 10–15 × 3–7 mm ( $\bar{x}$ = 12.3 × 5.2 µm) | Arising from swollen basal cells, micro-semi-macronematous, mononematous, straight or flexuous, unbranched, septate, smooth, thin-walled, hyaline to subhyaline, 5–90 × 1–1.5 µm |
| Conidiogenous cell | Erect, basauxic, cylindrical to ampulliform, apex pointed and hyaline, smooth and thick-         | Aggregated in clusters on hyphae or solitary, hyaline, erect, ampulliform | Basauxic, aggregated in clusters on hyphae, hyaline, smooth, elongated, conical to ampulliform, 25–30 × 4–6 | Holoblastic, ampulliform, cylindrical or doliiform, hyaline to olivaceous, 4–10 × 1.2–5 µm ( $\bar{x}$ = 8.6 × 4.2 µm)            | NA                                                                                                                                                                               |

|               |                                                                                                                                                                                                            |                                                                                                                                      |                                                                                                                                                                                                                                |                                                                                                                                                                                                                                                       |                                                                                                                                                                                                                                                                                                                |
|---------------|------------------------------------------------------------------------------------------------------------------------------------------------------------------------------------------------------------|--------------------------------------------------------------------------------------------------------------------------------------|--------------------------------------------------------------------------------------------------------------------------------------------------------------------------------------------------------------------------------|-------------------------------------------------------------------------------------------------------------------------------------------------------------------------------------------------------------------------------------------------------|----------------------------------------------------------------------------------------------------------------------------------------------------------------------------------------------------------------------------------------------------------------------------------------------------------------|
|               |                                                                                                                                                                                                            | walled,<br>pale<br>brown, 4–7<br>× 2–3 µm                                                                                            | µm ( $\bar{x}$ = 27 ×<br>4.7 µm)                                                                                                                                                                                               |                                                                                                                                                                                                                                                       |                                                                                                                                                                                                                                                                                                                |
| Conidia       | Globose in<br>face view,<br>subglobose<br>to oval in<br>the side<br>view,<br>brown to<br>dark<br>brown,<br>smooth,<br>apex and<br>base<br>blunted,<br>dark<br>equatorial<br>slit, 7.5–10<br>× 8.5–12<br>µm | Brown,<br>smooth<br>to<br>granular,<br>globose<br>to<br>elongate<br>ellipsoid,<br>(9.5–)10–<br>12 (– 13)<br>×<br>(7.5–)8.0–<br>10 µm | Brown,<br>smooth,<br>somewhat<br>granular,<br>globose to<br>ellipsoid in<br>face view,<br>with a<br>median scar,<br>lenticular in<br>side view,<br>with pale<br>equatorial<br>slit, 10–19 µm<br>diam., ( $\bar{x}$ = 13<br>µm) | Globose in face<br>view, lenticular<br>in side view,<br>with a pale<br>longitudinal slit,<br>dark brown,<br>thick-walled,<br>finely<br>roughened with<br>one or two<br>concentric pale<br>rings, 5–10 × 5.5–<br>11 µm ( $\bar{x}$ = 9.3 ×<br>10.1 µm) | Arising<br>acropleurogno<br>usly,<br>dimorphous,<br>lenticular,<br>ovoid in face<br>view, 10–15 ×<br>6.0–10.5 µm;<br>elongate to<br>clavate<br>conidia, 15–25<br>× 7.5–10 µm,<br>smooth,<br>double walled,<br>brown to pale<br>olivaceous<br>with<br>prominent<br>truncate base<br>and equatorial<br>germ slit |
| Sterile cells | NA                                                                                                                                                                                                         | NA                                                                                                                                   | Forming on<br>solitary loci<br>on hyphae,<br>brown, finely<br>roughened,<br>ellipsoid to<br>clavate, 20–30<br>× 9–13 µm ( $\bar{x}$<br>= 24 × 11 µm)                                                                           | NA                                                                                                                                                                                                                                                    | NA                                                                                                                                                                                                                                                                                                             |
| Reference     | [28]                                                                                                                                                                                                       | [52]                                                                                                                                 | [52]                                                                                                                                                                                                                           | [28]                                                                                                                                                                                                                                                  | [60]                                                                                                                                                                                                                                                                                                           |

NA: not determined.

**Supplementary Table S2.** Morphospecies of *Apiospora*.

| Taxa                       | Strain<br>Numbers | Substrates                                          | Known<br>lifestyle | Sexual/<br>Asexual<br>morph | Countries   |
|----------------------------|-------------------|-----------------------------------------------------|--------------------|-----------------------------|-------------|
| <i>Apiospora aberrans</i>  | -                 | On dead Bambusoideae<br>( <i>Bambusa blumeana</i> ) | Saprobe            | Sexual                      | Philippines |
| <i>Apiospora buddlejae</i> | -                 | On branches of <i>Buddleja</i>                      | Saprobe            | -                           | Portugal    |
| <i>Apiospora camarae</i>   | -                 | On twigs of <i>Osyris alba</i>                      | Saprobe            | -                           | Portugal    |

|                                     |                    |                                                                                 |                   |                |                                  |
|-------------------------------------|--------------------|---------------------------------------------------------------------------------|-------------------|----------------|----------------------------------|
| <i>Apiospora camptospora</i>        | Penzig 522         | Dead leaves of <i>Saccharum officinarum</i>                                     | Saprobe           | Sexual         | Jawa                             |
| <i>Apiospora carpineae</i>          | -                  | -                                                                               | Saprobe           | Sexual         | -                                |
| <i>Apiospora chilensis</i>          | -                  | On stems of <i>Chusquea cumingii</i>                                            | Saprobe           | Sexual         | Biobío, Los Lagos and Valparaíso |
| <i>Apiospora comedens</i>           | -                  | On dead leaves                                                                  | Saprobe           | Sexual         | Surinam                          |
| <i>Apiospora curvispora</i>         | Balansa 3823       | On rotten culms of Bambusaceae                                                  | Saprobe           | Sexual         | Paraguay                         |
| <i>Apiospora deschampsiae</i>       | -                  | On leaf of <i>Deschampsia cespitosa</i>                                         | Saprobe           | Sexual         | Switzerland                      |
| <i>Apiospora imperatae</i>          | -                  | On <i>Imperata cylindrica</i>                                                   | Saprobe           | Sexual         | Philippines                      |
| <i>Apiospora indica</i>             | Holotype HCIO 1229 | On <i>Bambusa</i>                                                               | Saprobe           | Sexual         | Kerala                           |
| <i>Apiospora inserta</i>            | -                  | On dead stems of arundinaceous plant                                            | Saprobe           | Sexual         | Suriname                         |
| <i>Apiospora liliacearum</i>        | -                  | On withered shoots of <i>Geitonoplesium cymosum</i> and <i>Smilax australis</i> | Saprobe           | Sexual/Asexual | New South Wales                  |
| <i>Apiospora lonicerae</i>          | -                  | On <i>Lonicera maximowiczii</i> and <i>Lonicera coerulea</i>                    | -                 | -              | former Soviet Union              |
| <i>Apiospora luzonensis</i>         | Merrill 3533       | On dead culms of <i>Bambusa</i>                                                 | -                 | -              | Philippines                      |
| <i>Apiospora montagnei</i>          | -                  | On stems of <i>Arundinaria mauritanica</i>                                      | Saprobe/endophyte | Sexual/Asexual | Algeria, France                  |
| <i>Apiospora muroiana</i>           | -                  | On dead culms of <i>Phyllostachys bambusoides</i>                               | -                 | -              | Japan                            |
| <i>Apiospora myrticola</i>          | -                  | On branches of Myrtaceae                                                        | Saprobe           | Sexual         | São Paulo                        |
| <i>Apiospora pachyspora</i>         | -                  | On living leaves of <i>Micania</i>                                              | Saprobe           | Sexual         | Brazil                           |
| <i>Apiospora parallela</i>          | -                  | In clum of <i>Calamagrostidis aridis</i>                                        | Saprobe           | Sexual         | southern Finland                 |
| <i>Apiospora petiolicola</i>        | -                  | On <i>Tilia</i>                                                                 | Pathogen          | Sexual         | Germany                          |
| <i>Apiospora phomatopsis</i>        | -                  | On rotten culms of <i>Zea mays</i>                                              | Saprobe           | Sexual         | Buenos Aires                     |
| <i>Apiospora phyllostachydicola</i> | -                  | On dead culms of <i>Phyllostachys bambusoides</i>                               | Saprobe           | None           | Japan                            |
| <i>Apiospora platensis</i>          | -                  | On rotten culms of <i>Pennisetum tristachyum</i>                                | Saprobe           | Sexual         | Buenos Aires                     |
| <i>Apiospora punctum</i>            | -                  | On rotten leaves of <i>Molinia</i> and of <i>Dactylon</i>                       | Saprobe           | Sexual         | Italy                            |
| <i>Apiospora rhododendri</i>        | 03-1892            | On dead branch of <i>Rhododendron</i>                                           | Saprobe           | Sexual         | Netherlands                      |
| <i>Apiospora rhodophila</i>         | -                  | On branches of <i>Rosa alpina</i>                                               | Saprobe           | Sexual         | Italy                            |
| <i>Apiospora rosae</i>              | -                  | <i>Rosa canina</i>                                                              | Saprobe           | Sexual         | Putten                           |
| <i>Apiospora rosenvingei</i>        | -                  | On stem of <i>Betulae glandulosae</i>                                           | Saprobe           | Sexual         | Narsak                           |
| <i>Apiospora rottboelliae</i>       | Baker 917          | On dead culms of <i>Rottboellia exaltata</i>                                    | Saprobe           | Sexual         | Philippines                      |
| <i>Apiospora rubi-fruticosi</i>     | -                  | On sarmens of <i>Rubus fruticosus</i>                                           | Saprobe           | Sexual         | Italy                            |

|                                 |           |                                                                                                  |         |                |             |
|---------------------------------|-----------|--------------------------------------------------------------------------------------------------|---------|----------------|-------------|
| <i>Apiospora rubi-ulmifolii</i> | -         | On twigs of <i>Rubus ulmifolius</i>                                                              | -       | -              | Morocco     |
| <i>Apiospora shiraiana</i>      | -         | On culms of <i>Bambusa</i> sp.                                                                   | -       | -              | Honshu      |
| <i>Apiospora siamicola</i>      | -         | -                                                                                                | -       | -              | -           |
| <i>Apiospora sparsa</i>         | Baker 105 | On dead culms of Poaceae                                                                         | Saprobe | Sexual         | Colombia    |
| <i>Apiospora sphaerosperma</i>  | -         | -                                                                                                | -       | -              | -           |
| <i>Apiospora spinulosa</i>      | -         | On dead <i>Panicum</i> sp. in culm <i>Andropogonis</i> , <i>Phragmitis</i> , <i>Bambuseprope</i> | Saprobe | Sexual         | Hawaiian Is |
| <i>Apiospora striola</i>        | -         | <i>Parma</i>                                                                                     | Saprobe | Sexual         | Italy       |
| <i>Apiospora tintinnabula</i>   | PDD 41022 | On dead culms of <i>Bambusa</i>                                                                  | Saprobe | Sexual/Asexual | New Zealand |
| <i>Apiospora urticae</i>        | -         | On dry stems of <i>Urtica</i>                                                                    | Saprobe | Sexual         | Germany     |
| <i>Apiospora yerbae</i>         | -         | On dead branches                                                                                 | Saprobe | Sexual         | Misiones    |

Notes: "-" = information not available.
